# Supplementary material
Source: MDPI journal article supplement (https://www.mdpi.com/1424-2818/14/8/632)
Supplement: s1 [file s1]

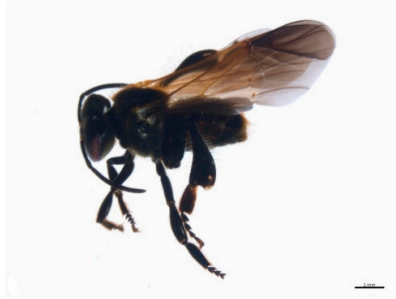

(a)

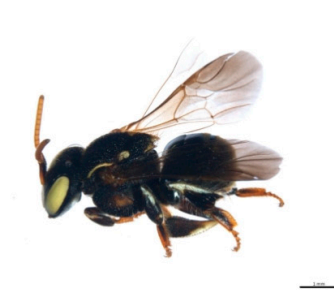

(b)

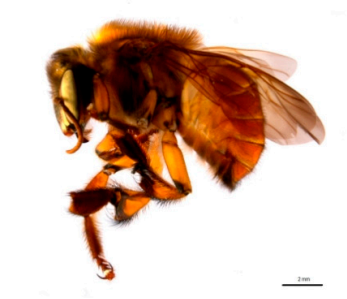

(c)

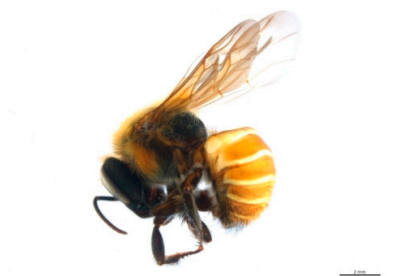

(d)

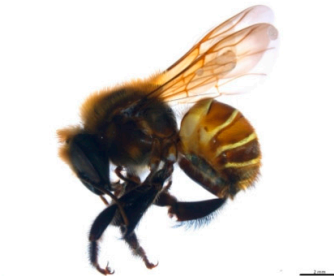

(e)

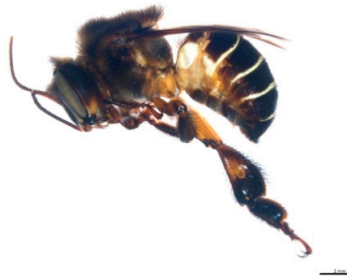

(f)

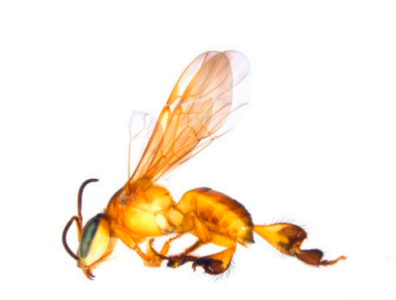

(g)

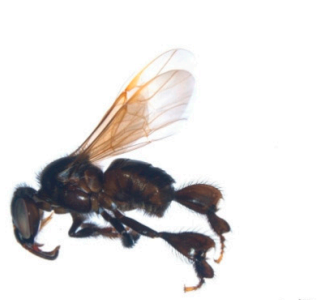

(h)

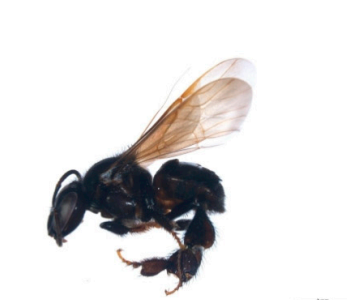

(i)

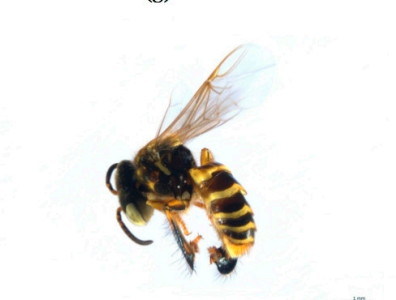

(j)

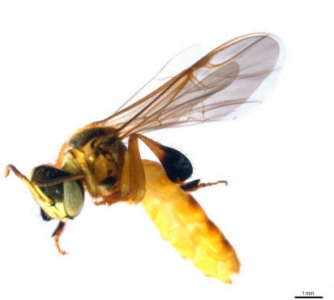

(k)

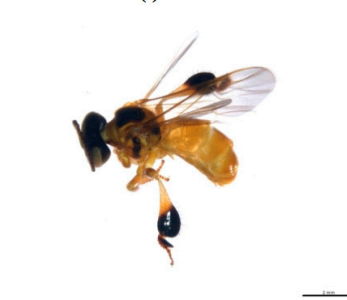

(l)

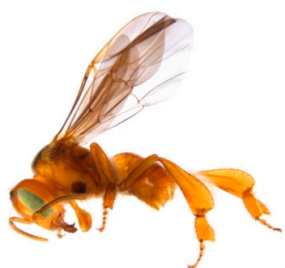

(m)

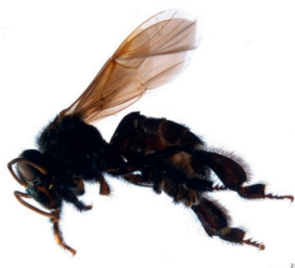

(n)

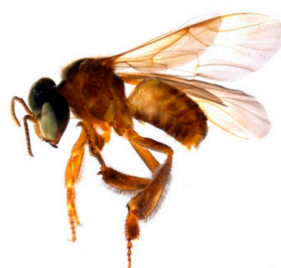

(o)

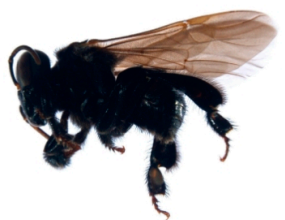

(p)

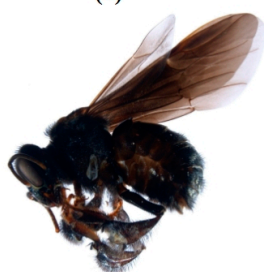

(q)

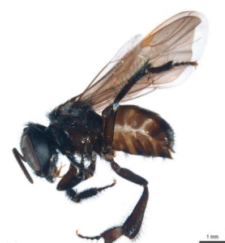

(r)

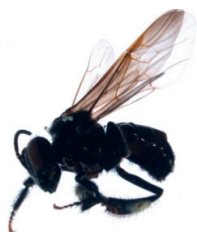

(s)

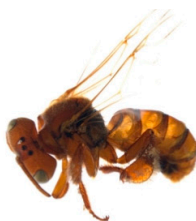

(t)

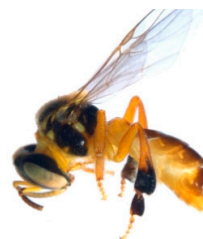

(u)

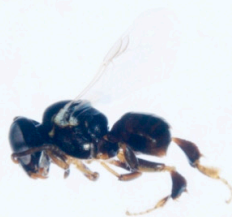

(v)

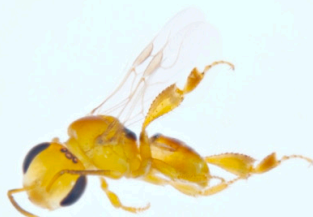

(w)

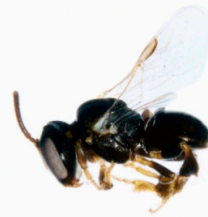

(x)

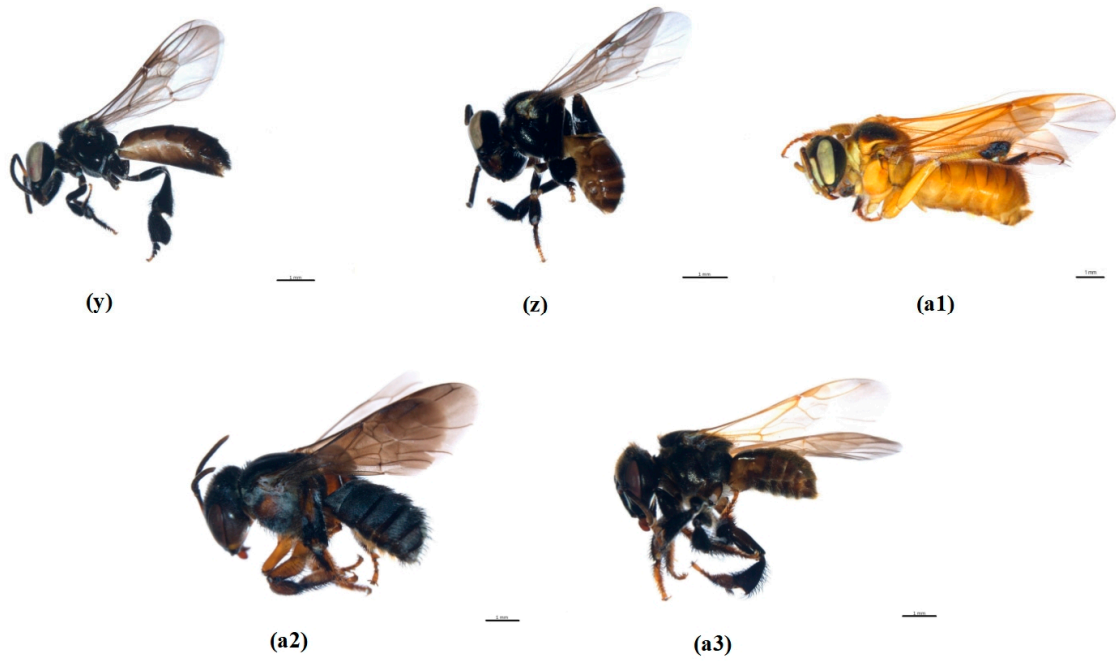

**Figure S2.** Representative specimens of different genera/species of Meliponini collected in San Martin and Piura regions (Peru). **(a)** *Geotrigona* cf. *fulvohirta* (JP14), **(b)** *Nannotrigona* sp. (MA100-1), **(c)** *Melipona* cf. *cramptoni* (JPA0012), **(d)** *M.* cf. *eburnea* Clade A (JP48), **(e)** *M.* cf. *eburnea* Clade B (PY23), **(f)** *M.* cf. *illota* (PY56), **(g)** *Partamona* *testacea* (JPA001), **(h)** *P.* cf. *epiphytophila* (JPA005), **(i)** *P.* sp. (JPA006), **(j)** *Tetragona* cf. *clavipes* (POA25), **(k)** *T. goettei* (POA36), **(l)** *T.* sp. (POA11), **(m)** *Trigona muzoensis* (JP49), **(n)** *T. amazonensis* (UT57); **(o)** *T. williana* (JPA0014), **(p)** *T.* cf. *fuscipennis* (UT59), **(q)** *T.* cf. *amalthea* (JP74), **(r)** *T.* cf. *hypogea* (PY41), **(s)** *T.* sp. 1 (JPA009), **(t)** *T.* sp. 2 (PY08), **(u)** *Tetragonisca angustula* (POA39), **(v)** *Trigonisca* cf. *atomaria* (MA9-1), **(w)**, *T.* sp. 1 (JP29), **(x)** *T.* sp. 2 (MA2), **(y)** *Scaura tenuis* (JP8-1), **(z)** *Scaura* cf. *latitarsis* (JPA004), **(a1)** *Ptilotrigona* cf. *pereneae* (JP53), **(a2)** *Scaptotrigona* sp. 1 (POA44), **(a3)** *Scaptotrigona* sp. 2 (MA51).
