# Supplementary material
Source: MDPI journal article supplement (https://www.mdpi.com/1424-2818/14/8/632)
Supplement: s1 [file s1]

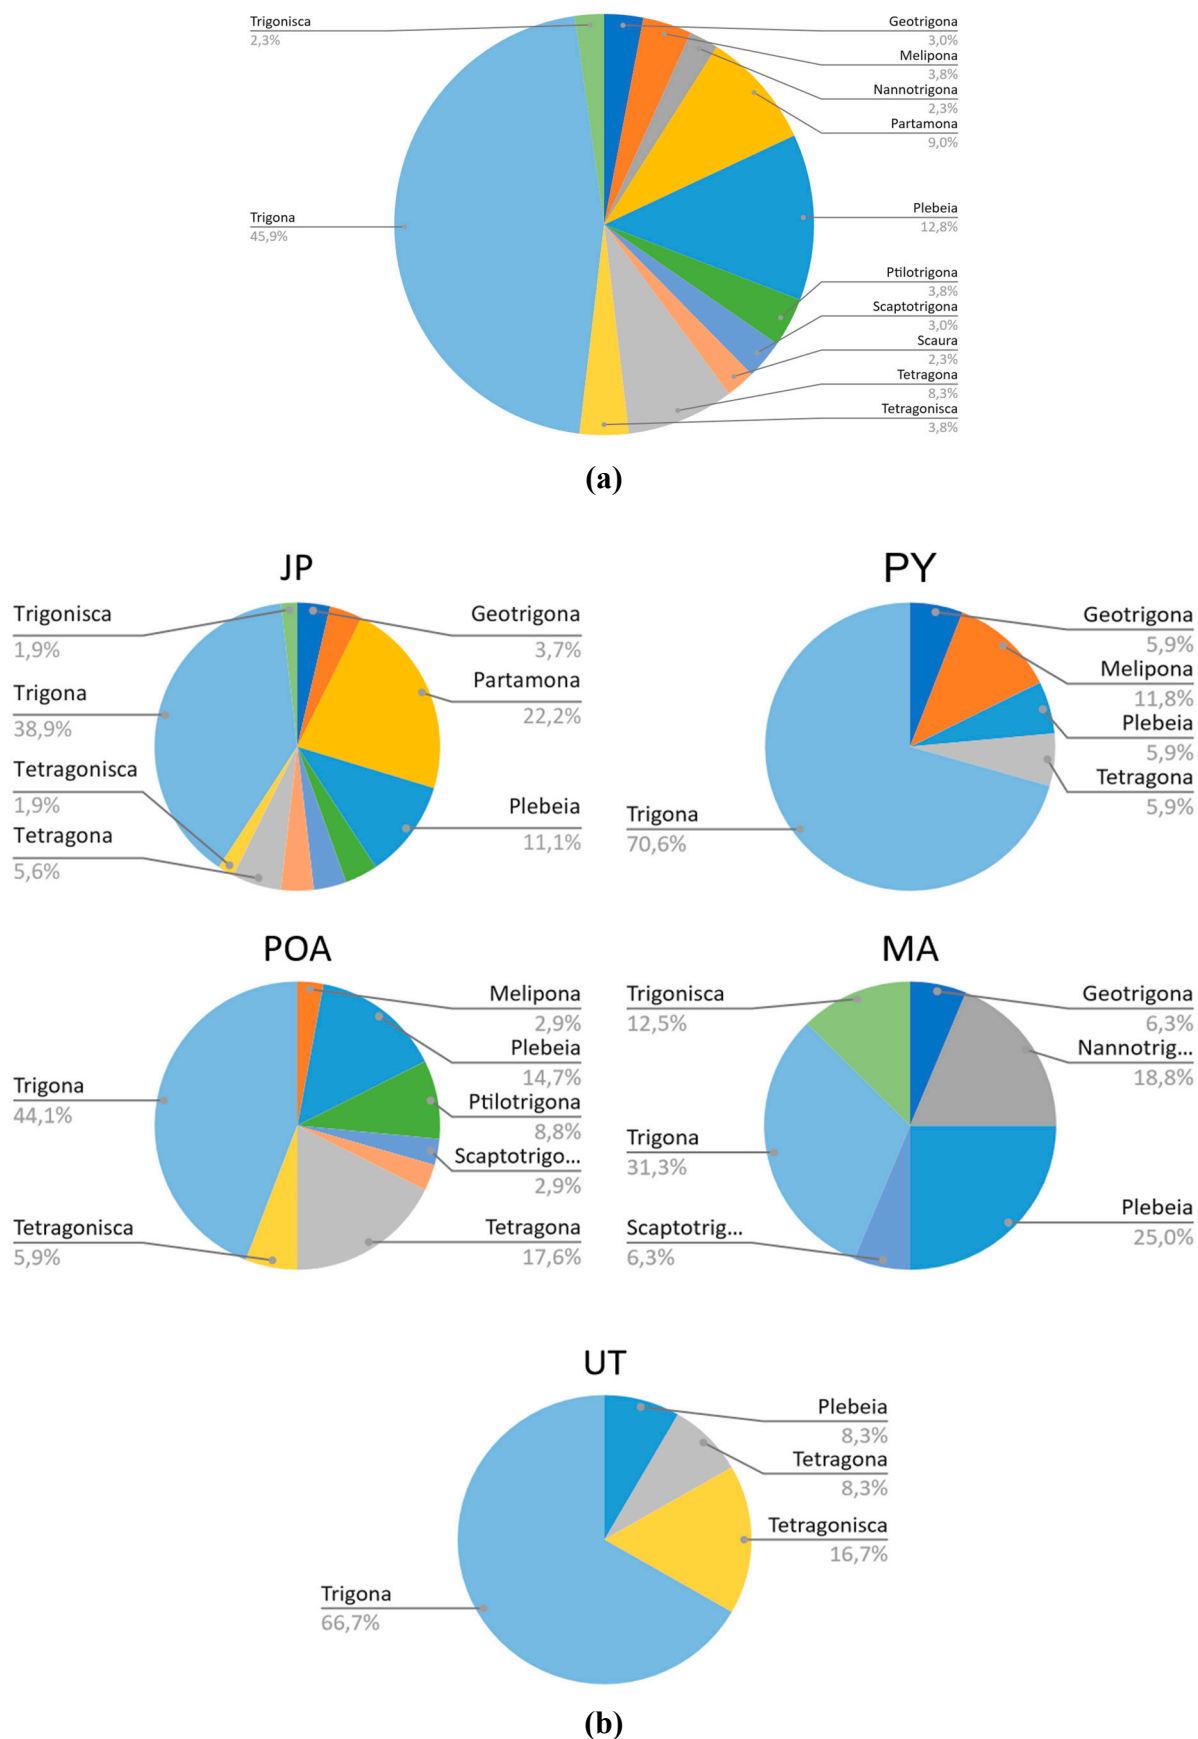

**Figure S1.** (a) Relative abundance (%) of stingless bee genera (N= 133), (b) Relative abundance (%) of stingless bee genera among sampling sites (JP= Juliampampa; PY= Pabloyacu; POA= Pongo de Caynarachi; MA= Mangamanguilla; UT= Utcuarca).
