# Supplementary material
Source: MDPI journal article supplement (https://www.mdpi.com/1424-2818/14/8/632)
Supplement: s1 [file s1]

| SAMPLE CODE                        | PTP | bPTP | ASAP |
|------------------------------------|-----|------|------|
| JP1                                | d   | d    | b    |
| JP3/JPA008-1/JP34/JP36             | d   | d    | b    |
| JP4                                | b   | a    | b    |
| JP5                                | b   | a    | a    |
| JP8                                | c   | a    | c    |
| JP12                               | d   | b    | d    |
| JP18/JP35/JP40/JP52/JP56/JP57/JP60 | d   | a    | d    |
| JP23                               | d   | d    | a    |
| JP26/JP63/JP74                     | d   | d    | d    |
| JP27                               | d   | d    | a    |
| JP28/JP53                          | c   | a    | d    |
| JP29                               | b   | b    | b    |
| JP32/JP51                          | b   | b    | b    |
| JP48                               | d   | a    | d    |
| JP54                               | d   | d    | b    |
| JP55                               | d   | d    | b    |
| JPA001                             | d   | a    | a    |
| JPA003                             | d   | a    | d    |
| JPA004                             | d   | d    | d    |
| JPA005                             | b   | a    | b    |
| JPA006                             | a   | a    | a    |
| JPA007/JP49                        | d   | d    | b    |
| JPA009-1/JP10/JP21                 | d   | d    | b    |
| JPA0010/JP44                       | d   | d    | b    |
| JPA0011                            | d   | d    | b    |
| JPA0012                            | d   | b    | d    |
| JPA0014                            | d   | b    | d    |
| JPA0015/JPA0016                    | d   | d    | d    |
| PY4/PY54                           | d   | d    | b    |
| PY6                                | d   | d    | b    |
| PY8                                | d   | d    | a    |
| PY12/PY21-1/PY61                   | d   | d    | b    |
| PY19                               | b   | b    | d    |
| PY23                               | d   | b    | d    |
| PY29                               | d   | d    | d    |
| PY31                               | d   | d    | b    |
| PY41                               | d   | d    | a    |
| PY55                               | d   | d    | b    |
| PY56                               | d   | b    | d    |
| PY58                               | d   | d    | b    |
| POA1/POA30/POA41                   | c   | a    | d    |
| POA3                               | d   | d    | b    |
| POA5/POA18                         | d   | d    | b    |
| POA9/POA16/POA19/POA20/POA29/POA35 | d   | d    | b    |
| POA11                              | b   | b    | b    |
| POA12/POA13                        | d   | d    | b    |
| POA14                              | d   | d    | a    |
| POA15                              | d   | d    | b    |
| POA16                              | d   | d    | b    |
| POA17                              | b   | b    | b    |
| POA21                              | d   | d    | b    |

|               |   |   |   |
|---------------|---|---|---|
| POA24         | d | d | d |
| POA25         | d | b | d |
| POA28         | b | b | b |
| POA31         | d | a | d |
| POA33         | b | a | b |
| POA36         | b | b | b |
| POA42         | d | b | d |
| MA2           | b | b | b |
| MA4-1         | d | d | b |
| MA6-1         | d | d | b |
| MA9           | b | b | b |
| MA10-1/MA13-1 | d | d | b |
| MA29-1        | d | d | b |
| MA51-1        | d | d | d |
| UT5           | d | d | b |
| UT11          | d | d | a |
| UT17          | a | a | b |
| UT18/UT59     | d | d | b |
| UT20-1        | d | d | b |
| UT51          | d | d | b |
| UT57          | d | d | b |
| UT60          | d | d | d |

**Table S1.** Classification of stingless bee specimens according to species delimitation methods (ASAP, bPTP, PTP). a: OTU separate from all other BOLD entries and no additional OTUs with conspecific entries (as entered in BOLD); b: OTU separate from all other BOLD entries but there are also additional OTUs with conspecific entries; c: OTU composed of conspecific BOLD entries and there are no additional OTUs with conspecific entries; d: OTU composed of conspecific BOLD entries and there are additional OTUs with conspecific entries. The OTU type “a” is emphasized in red.
