# Supplementary material
Source: MDPI journal article supplement (https://www.mdpi.com/1424-2818/14/8/632)
Supplement: s1 [file s1]

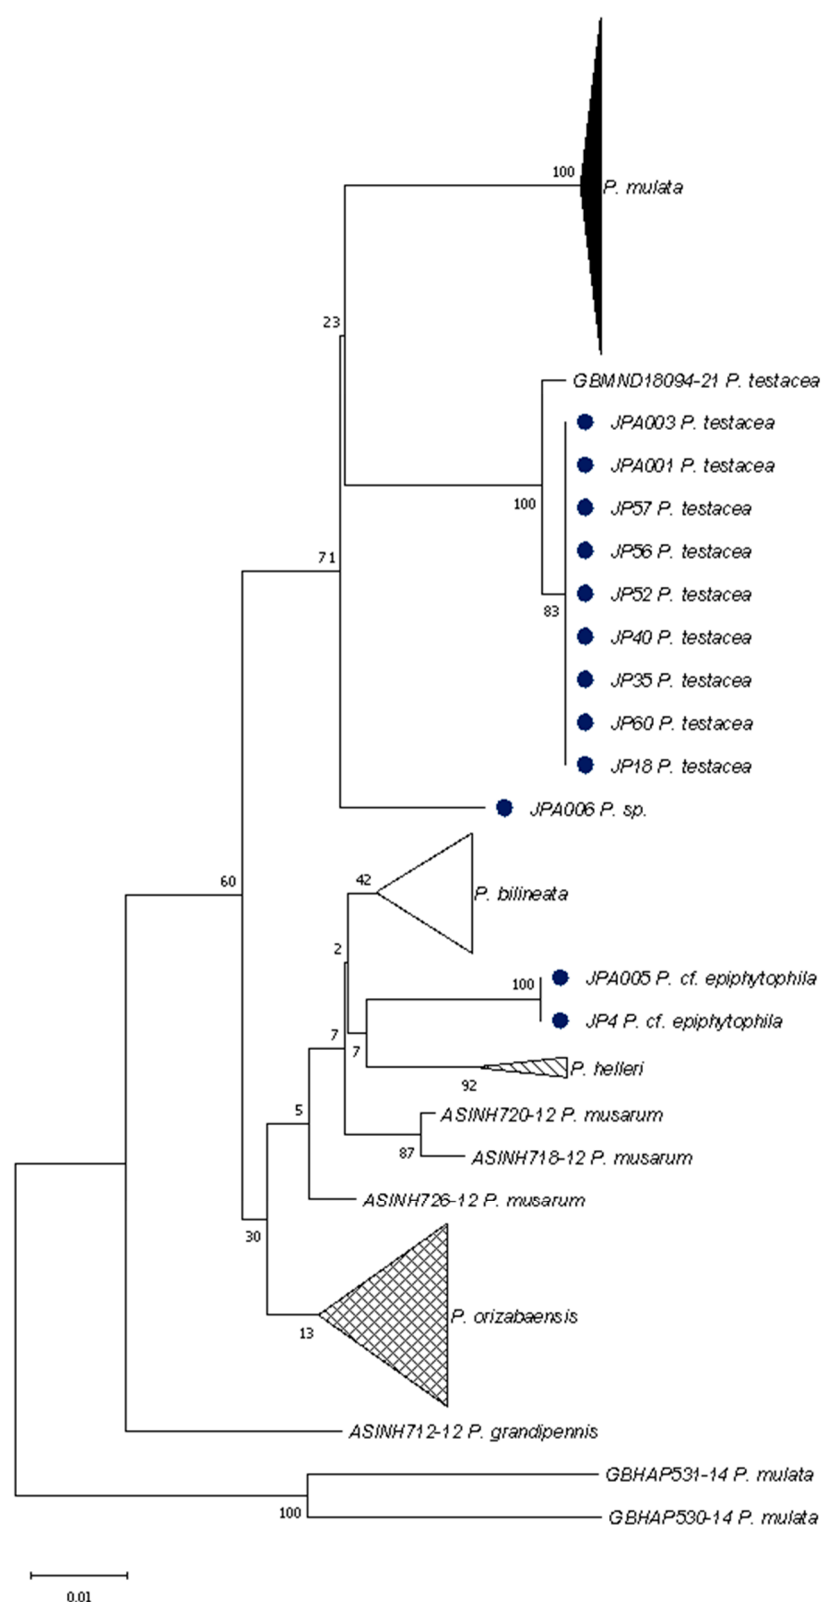

(a)

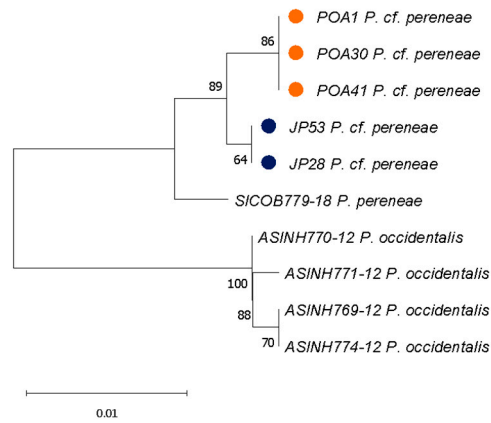

(b)

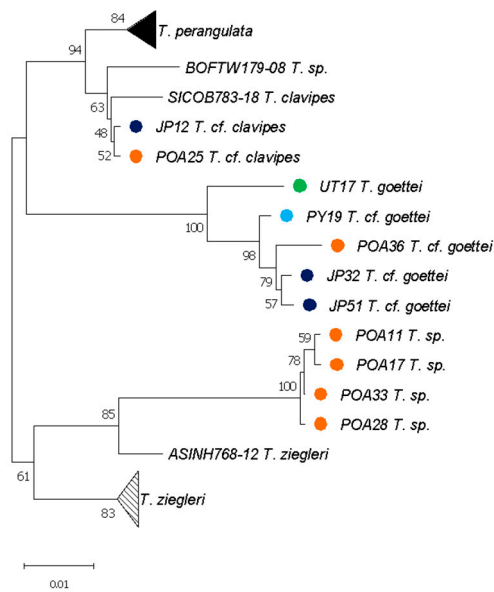

(c)

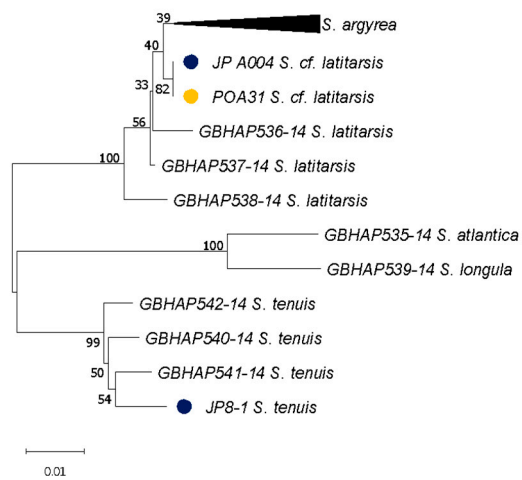

(d)

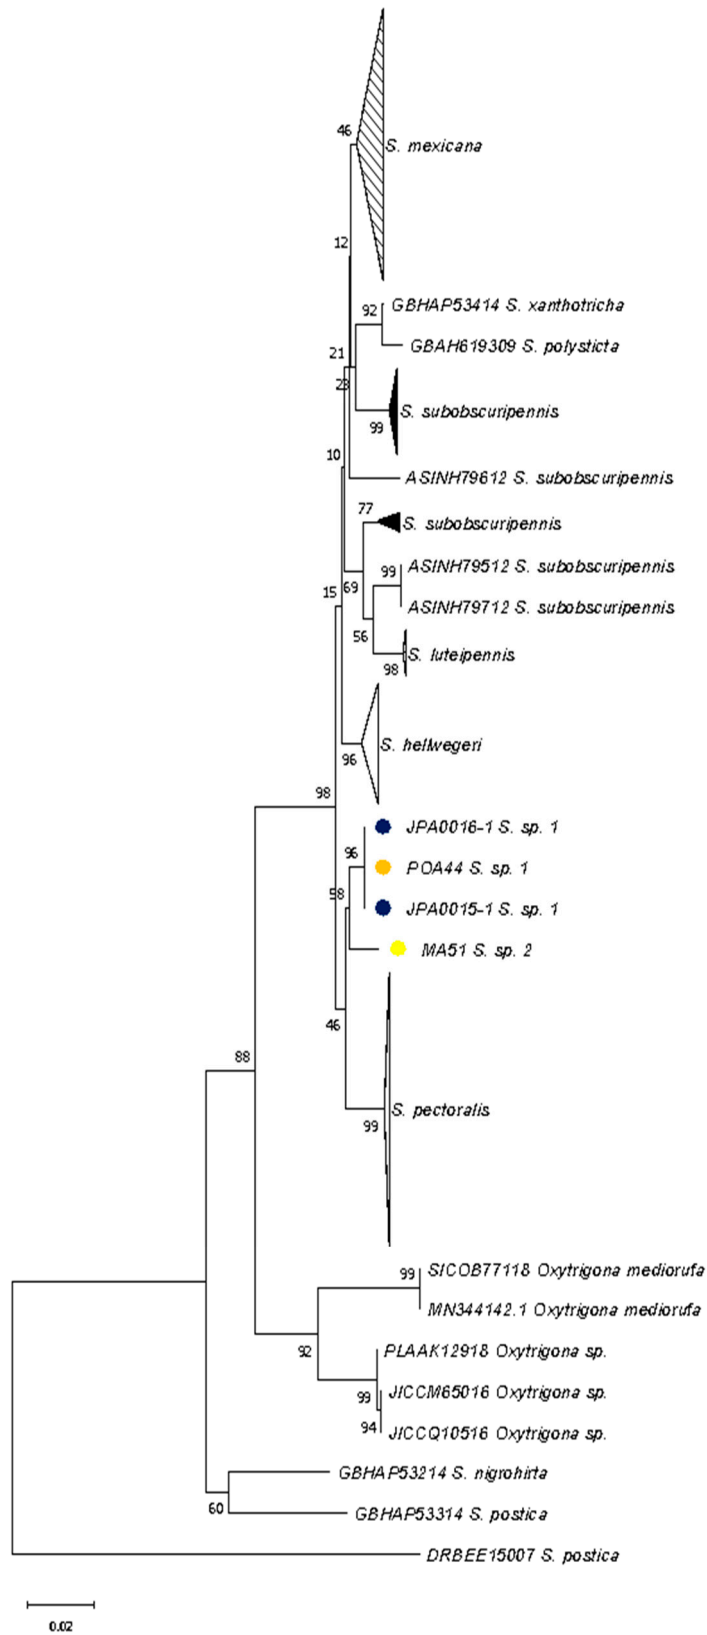

(e)

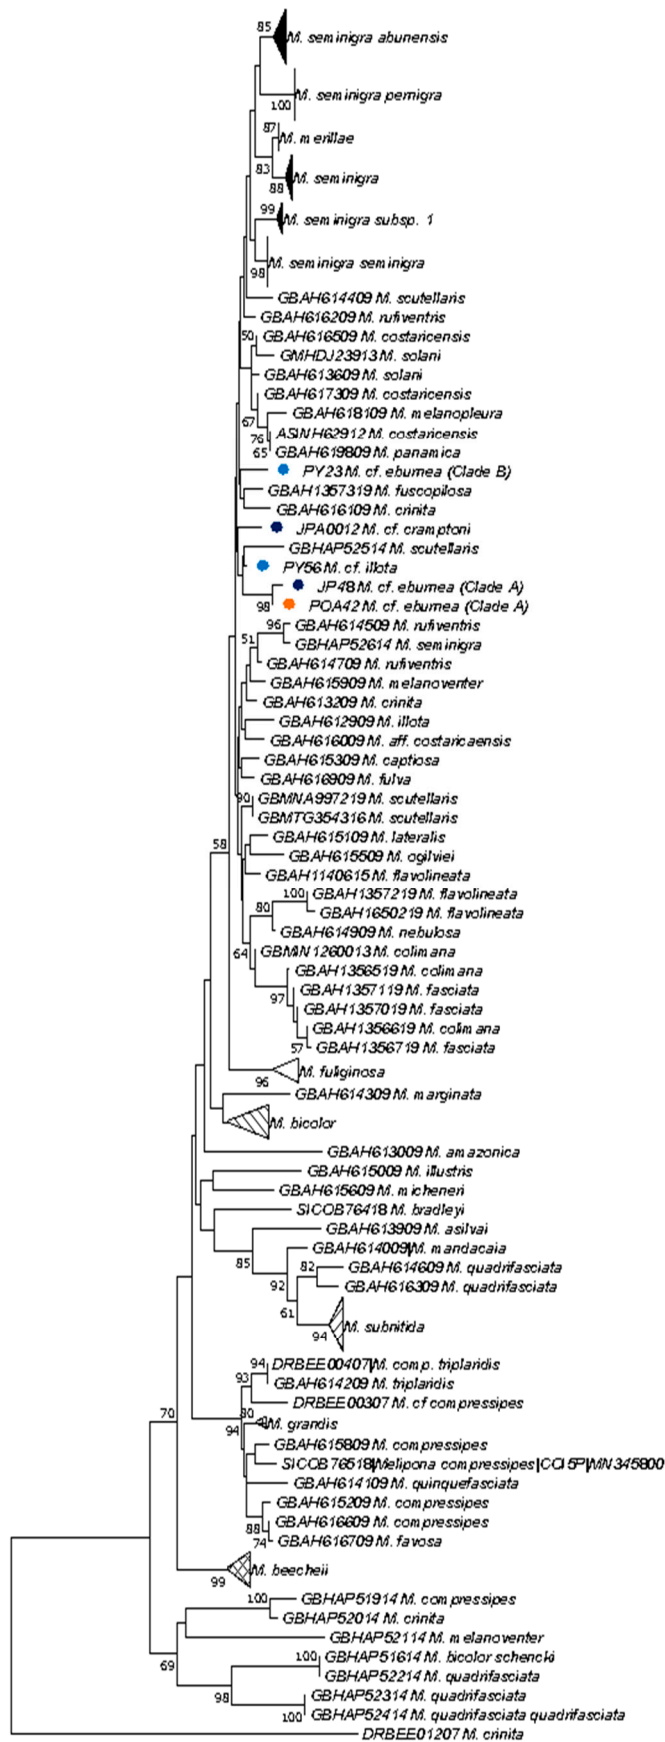

0.02

(f)

**Figure S3.** Neighbor-Joining COI tree (K2P corrected distances) of **(a)** *Partamona*, **(b)** *Ptilotrigona*, **(c)** *Tetragona*, **(d)** *Scaura*, **(e)** *Scaptotrigona* and **(f)** *Melipona* . Only bootstrap values >70 are shown. Original sequence data were merged with those retrieved in BOLD. Labels of Peruvian specimens collected in this study are highlighted in different colors, according to sampling sites.
